# Supplementary material
Source: PubMed Central journal article supplement (PMC1803735)

Figure S2

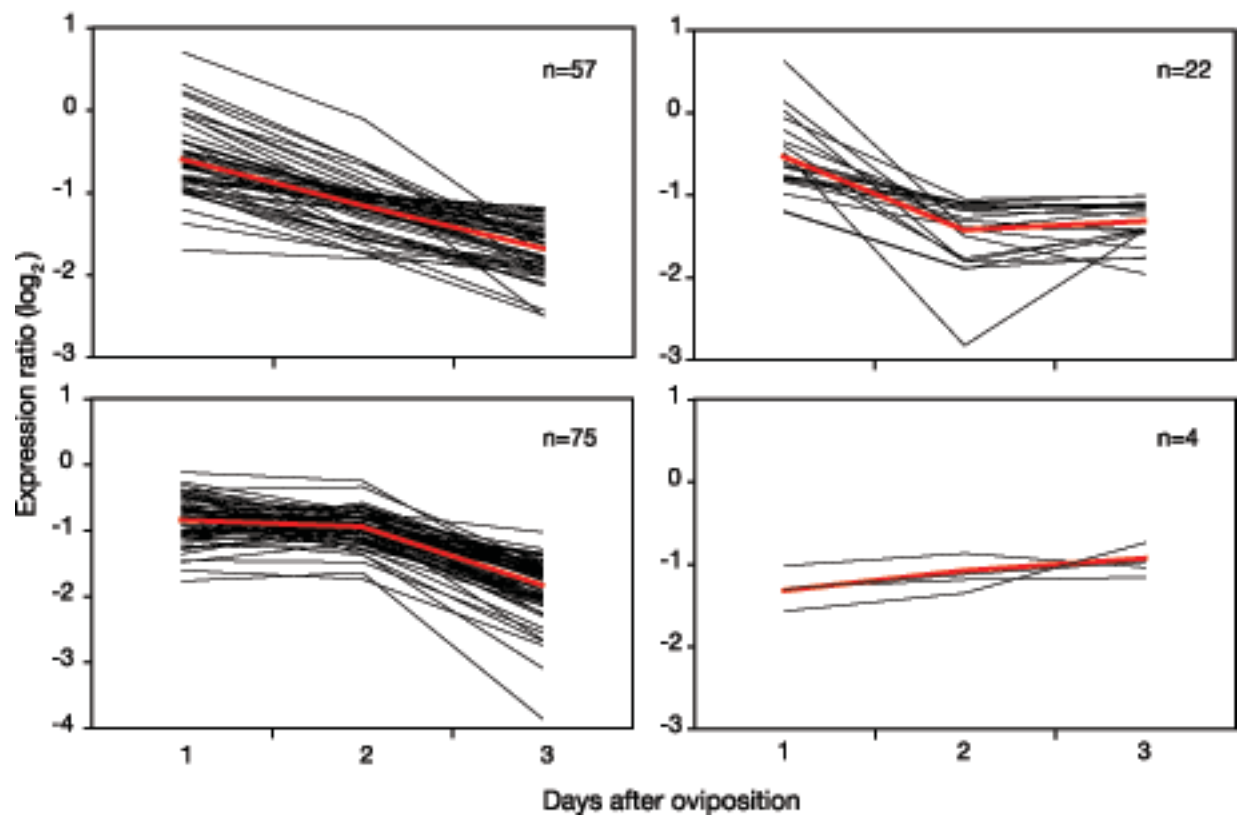

Supplement: plntphys_pp.106.090837_2.pdf [file plntphys_pp.106.090837_2.pdf]
